# Supplementary material
Source: HighWire-hosted journal article supplement (https://bmjopen.bmj.com/content/10/9/e036277)
Supplement: inline-supplementary-material-1 [file inline-supplementary-material-1.pdf]

Table S1: Structure and content of the Yoga sessions

| Yogic practices           | Week 1-4<br>Each session will last for 45 minutes with the time split as follows: | Week 5+<br>Each session should last for 75 minutes with the time split as follows: | Details                                                                                                                                                                                                                                                                                                                                                                                                                                                                                                                                                                                                                                                                                                                                                                                                                                                                                                                                                                                                                               |
|---------------------------|-----------------------------------------------------------------------------------|------------------------------------------------------------------------------------|---------------------------------------------------------------------------------------------------------------------------------------------------------------------------------------------------------------------------------------------------------------------------------------------------------------------------------------------------------------------------------------------------------------------------------------------------------------------------------------------------------------------------------------------------------------------------------------------------------------------------------------------------------------------------------------------------------------------------------------------------------------------------------------------------------------------------------------------------------------------------------------------------------------------------------------------------------------------------------------------------------------------------------------|
| Shithilikarana<br>Vyayama | Around 5 minutes                                                                  | Around 5 minutes                                                                   | (1) Neck rotation 30 seconds<br>(2) Shoulder rotation 30 seconds<br>(3) Elbow flexion and extension 30 seconds<br>(4) Wrist rotation 30 seconds<br>(5) Finger movement 30 seconds<br>(6) Waist rotation 30 seconds<br>(7) Knee flexion and extension 1 minute<br>(8) Ankle rotation 1 minute<br>(9) Toe movement 30 seconds                                                                                                                                                                                                                                                                                                                                                                                                                                                                                                                                                                                                                                                                                                           |
| Surya Namaskar            | --                                                                                | Around 15 minutes                                                                  | The below mentioned 12 steps constitute one set of Surya Namaskar. To complete one round of Surya Namaskar, participants need to repeat these 12 steps on the other side of their body (i.e., by extending their left leg behind in step number 4 and bringing their left leg forward in step number 9). Initially, they should practise Surya Namaskar at a slower pace. Only with practice over some time, they may try to do 12 rounds of it at a faster pace for around 15 minutes (i.e., a couple of seconds per step).<br>(1) Pranamasana (prayer pose)<br>(2) Hastauttanasana (raised arms pose)<br>(3) Padahastanasana (hands to feet pose)<br>(4) Ashwa Sanchalanasana (equestrian pose)<br>(5) Dandasana (stick pose)<br>(6) Ashtanga Namaskara Asana (salute with eight parts)<br>(7) Bhujangasana (cobra pose)<br>(8) Parvatasana (mountain pose)<br>(9) Ashwa Sanchalanasana (equestrian pose)<br>(10) Padahastanasana (hands to feet pose)<br>(11) Hastauttanasana (raised arms pose)<br>(12) Pranamasana (prayer pose) |
| Asana                     | Around 15 minutes                                                                 | Around 30 minutes                                                                  | Two-sided poses (right and left) are to be practised for about 3 minutes (1.5 minutes on each side) and central-positioned poses are to be practised for about 1.5 minutes. In each session, the Yogic poses are selected from the list below to prevent boredom from the similarity of routine. Advanced Yogic poses are introduced from week 5 onwards, for example, Konasana (angle pose), Trikonasana (triangle pose), Paravakonasana (lateral angle pose), Ardhastrasana (half camel pose), Ustrasana (camel pose), Dhanurasana (bow pose) and Naukasana (boat pose).<br>(A) Standing poses                                                                                                                                                                                                                                                                                                                                                                                                                                      |

|                                 |                |    |                |                                                                                                                                                                                                                                                                                                                                                                                                                                                                                                                                                                                                                                                                                                                                                                                                                                                                                                                                                                                                                                                                                                                                                                                                                                                                                                                                                                                              |                                                                                                                                                                                                                                                                                                                               |
|---------------------------------|----------------|----|----------------|----------------------------------------------------------------------------------------------------------------------------------------------------------------------------------------------------------------------------------------------------------------------------------------------------------------------------------------------------------------------------------------------------------------------------------------------------------------------------------------------------------------------------------------------------------------------------------------------------------------------------------------------------------------------------------------------------------------------------------------------------------------------------------------------------------------------------------------------------------------------------------------------------------------------------------------------------------------------------------------------------------------------------------------------------------------------------------------------------------------------------------------------------------------------------------------------------------------------------------------------------------------------------------------------------------------------------------------------------------------------------------------------|-------------------------------------------------------------------------------------------------------------------------------------------------------------------------------------------------------------------------------------------------------------------------------------------------------------------------------|
|                                 |                |    |                | <p>(1) Tadasana (palm tree pose) 1.5 minutes</p> <p>(2) Ardhashakrasana (half wheel pose) 1.5 minutes</p> <p>(3) Katichakrasana (waist wheel pose) 3 minutes</p> <p>(4) Konasana (angle pose) or Trikonasana (triangle pose) or Paravakonasana (lateral angle pose): alternatively 3 minutes</p> <p>(B) Sitting poses</p> <p>(1) Vajrasana (adamant pose) 1.5 minutes</p> <p>(2) Mandukasana (frog pose) 1.5 minutes</p> <p>(3) Ardhastrasana (half camel pose) or Ustrasana (camel pose): alternatively 1.5 minutes</p> <p>(4) Vakrasana (twisted pose) or Ardhamatsyendrasana (half spinal twist pose): alternatively 3 minutes</p> <p>(5) Paschimottanasana (seated forward bend pose) or Janusirsasana (head to knee pose): alternatively 1.5 minutes or 3 minutes, respectively</p> <p>(C) Lying poses- front/prone</p> <p>(1) Ardhashalabhasana (half locust pose) or Poornashalabhasana (full locust pose): alternatively 3 minutes or 1.5 minutes, respectively</p> <p>(2) Dhanurasana (bow pose) 1.5 minutes</p> <p>(3) Makarasana (crocodile pose) 1.5 minutes</p> <p>(D) Lying poses- back/supine</p> <p>(1) Uttanapadasana (raised legs pose) or Ardhalasana (half plough pose): alternatively 1.5 minutes</p> <p>(2) Pavanamuktasana (wind relieving pose) 1.5 minutes</p> <p>(3) Naukasana (boat pose) 1.5 minutes</p> <p>(4) Saralmatsyasana (easy fish pose) 1.5 minutes</p> |                                                                                                                                                                                                                                                                                                                               |
| Pranayama                       | Around minutes | 13 | Around minutes | 13                                                                                                                                                                                                                                                                                                                                                                                                                                                                                                                                                                                                                                                                                                                                                                                                                                                                                                                                                                                                                                                                                                                                                                                                                                                                                                                                                                                           | <p>(1) Vibhagiya Pranayama (sectional breathing) 4 minutes</p> <p>(2) Nadishodhana Pranayama (alternate nostril breathing) 3 minutes</p> <p>(3) Kapalbhatai Pranayama (skull shining breathing) or Bhastrika Pranayama (bellows breathing): alternately 3 minutes</p> <p>(4) Bhramari Pranayama (bee breathing) 3 minutes</p> |
| Dhyana and relaxation practices | Around minutes | 12 | Around minutes | 12                                                                                                                                                                                                                                                                                                                                                                                                                                                                                                                                                                                                                                                                                                                                                                                                                                                                                                                                                                                                                                                                                                                                                                                                                                                                                                                                                                                           | <p>In each session, the following Dhyana and relaxation practices are to be done in a darkened room.</p> <p>(1) A Kara chanting, U Kara chanting and M Kara chanting 3 minutes</p> <p>(2) Yoga Nidra (Yogic sleep) 9 minutes</p>                                                                                              |
